# Supplementary material for: Conductive microcapsules for self-healing electric circuits
Source: Royal Society of Chemistry journal article supplement (doi:10.1039/c5ra22021a), 2015-01-01
Supplement: c5ra22021a1.pdf [file c5ra22021a1.pdf]

Supporting Information for Manuscript Entitled with

## **Conductive Microcapsules for Self-healing Electric Circuits**

*Gung-Wu Lai,<sup>a</sup> Shinn-Jen Chang,<sup>b</sup> Jyh-Tsung Lee,<sup>c,d</sup> Henry Liu,<sup>a</sup> and Chia-Chen Li<sup>a,\*</sup>*

<sup>a</sup>Department of Materials & Mineral Resources Engineering, and Institute of Materials Science and Engineering, National Taipei University of Technology, Taipei 10608, Taiwan

<sup>b</sup>Material and Chemical Research Laboratories, Industrial Technology Research Institute, Hsinchu 30011, Taiwan

<sup>c</sup>Department of Chemistry, and Center for Nano Science and Technology, National Sun Yat-Sen University, Kaohsiung 80424, Taiwan

<sup>d</sup>Department of Medicinal and Applied Chemistry, Kaohsiung Medical University, Kaohsiung 80708, Taiwan

\*Corresponding Author. Tel: +886-2-27712171 ext.2761, email: ccli@ntut.edu.tw

## Experimental Section

**Raw Materials:** Urea (99%, Showa, Japan) and formaldehyde (37%, Echo, Taiwan) are the primary chemical reagents for the synthesis of shell wall material of microcapsules. Resorcinol (98%, Acros, USA), ammonium chloride (99.5%, Showa, Japan) and triethanolamine (99%, Sigma-Aldrich, USA) were used as additives for synthesis. Eicosane (99%, Acros, USA) was used as the core material for the synthesized microcapsules. The surfactant used for encapsulation was poly(ethylene-alt-maleic anhydride) (EMA; 99%, Sigma-Aldrich, USA). Gum arabic (99%, Parchem, USA) was used as the dispersant and silver nitrate ( $\text{AgNO}_3$ ; 99%, Solar Technology, Taiwan), glucose (99.5%, Sigma-Aldrich, USA) and ammonia solution ( $\text{NH}_4\text{OH}_{(\text{aq})}$ ; 30%, Showa, Japan) were used as reagents for the surface coating of as-synthesized microcapsules. All chemical reagents mentioned above were used as-received.

**Synthesis of Poly(urea-co-formaldehyde) (PUF) Microcapsules:** The technique for encapsulation was in-situ polymerization. As the first step, the additives of 0.25 g resorcinol and 0.25 g ammonium chloride were mixed with 2.5 g urea and dissolved in 100 ml de-ionized water. This aqueous solution was then warmed to 40 °C and the pH was adjusted to 3.5 by the addition of triethanolamine. The melted 5.5 ml eicosane was dropped into the aqueous solution and emulsified using a homogenizer (T25, IKA, Germany) with a speed of 13,000 rpm for 5 min. After homogenization, 6.33 g formaldehyde was instantly added and the emulsion was heated to 55 °C and stirred on a hot-plate for an additional 2 hrs. After the reaction, microcapsules were removed from the suspension and washed repeatedly using de-ionized water.

**Surface Coating on PUF Microcapsules:** 0.30 g of the microcapsules were re-dispersed into 70 ml de-ionized water by using 0.35 g gum arabic as the dispersant. After stirring for 30 min, the suspension of microcapsules was mixed with an aqueous solution of 0.35 g AgNO<sub>3</sub> and 0.6 ml NH<sub>4</sub>OH<sub>(aq)</sub> for another 30 min. The suspension was set under constant 4 °C and slowly mixed with 20 ml aqueous solution of 0.40 g glucose and 0.17 g NaOH. The mixture was kept stirring at 400 rpm for 2 hrs for the reduction of Ag<sup>+</sup> on the surface of microcapsules.

**Characterizations:** The microstructures were characterized by field emission scanning electron microscopy (FE-SEM; S-470, Hitachi, Tokyo, Japan). The surface chemistry of microcapsules was characterized through the electroacoustic method (ZetaProbe, Colloidal Dynamics Inc., MA, USA) by measuring the zeta-potential of the aqueous suspensions of microcapsules with a solid loading of 0.5 wt%. The thermal properties of microcapsules were analyzed by thermogravimetric analysis (TG; Q50, TA instruments Ltd., Crawley, UK). Silver based circuits were prepared by blending 20 vol% of various microcapsules with conductive silver paste (product no. 16031) that was purchased from TED PELLA, Inc. The silver paste blend was casted by a micrometer-controlled doctor blade on a regular glass and dried under room temperature for 24 hrs, and then the electrical properties were measured on a power supplier (PST-3202, GW Instek, Taiwan).

## Additional Results

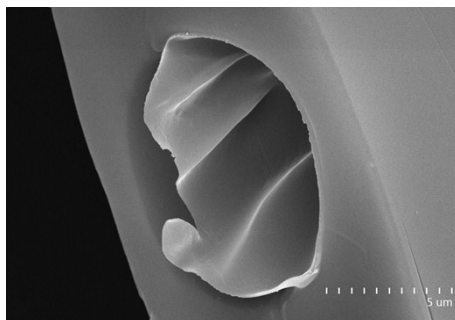

**Figure S1** Cross-sectional SEM image of a broken PUF-C20 microcapsule embedded in resin (core eicosane has been dissolved by solvent), showing a shell thickness of about 50-100 nm.

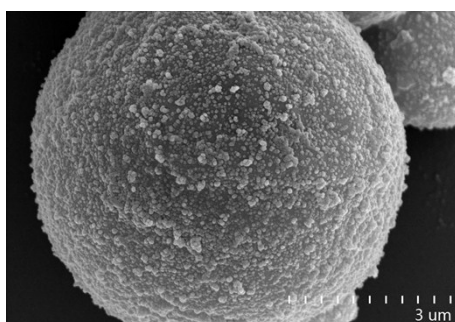

**Figure S2** High resolution SEM image, showing the size of the surface-coated Ag nanoparticles is about 50 nm.

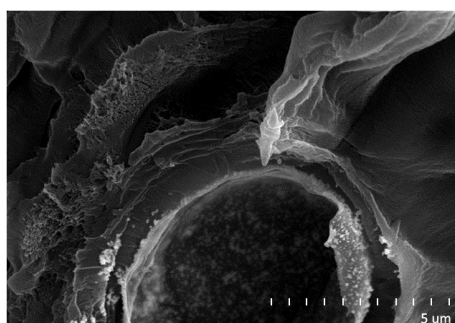

**Figure S3** Cross-sectional SEM image of a broken Ag@mPUF-C20 microcapsule embedded in resin, showing the thickness of the shell with coated Ag nanoparticles is about 150 nm.

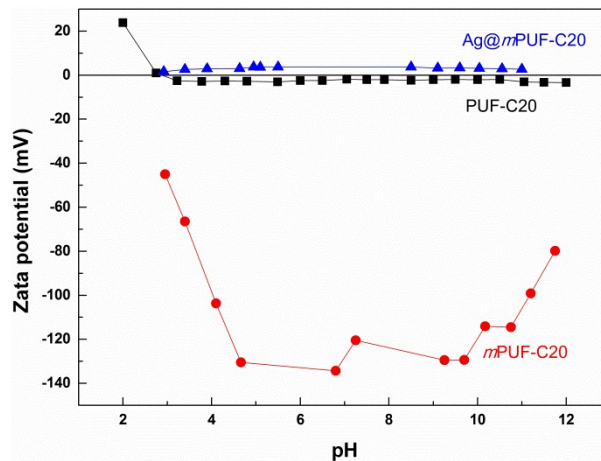

**Figure S4** Zeta potentials of various microcapsules in aqueous suspensions with a solid loading of 0.5 wt%. The zeta potentials of PUF-C20 are primarily within 0 mV and -5 mV and are insensitive to the pH. With the addition of 2.5 wt% (based upon the weight of PUF-C20) gum arabic, the zeta potentials of the gum arabic adsorbed PUF-C20 (*m*PUF-C20) significantly shifted to large magnitude negative values. After reduction of Ag on the surface of *m*PUF-C20, the zeta potential shifted to + 3 mV, with low positive values resembling the characteristic surface chemistry of metallic Ag.

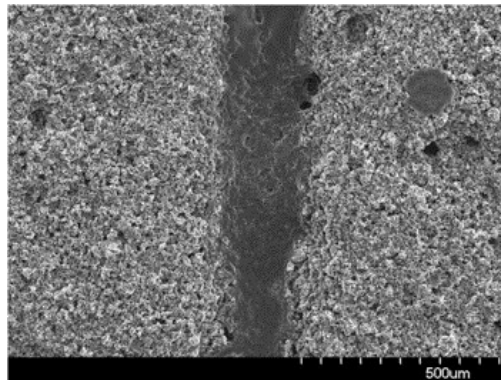

**Figure S5** SEM image of the recovered zone viewed from the top surface of the cast Ag circuit. The solid loading of the PUF-C20 microcapsule embedded in the Ag matrix was 20 vol%. The valley of the crack was filled with the core material, eicosane.

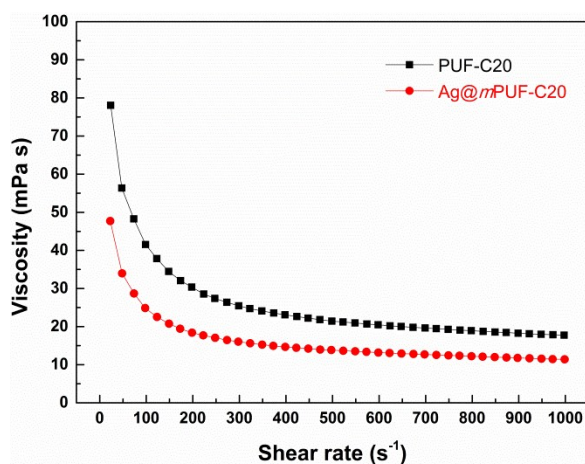

**Figure S6** Viscosities as the functions of shear rates for the two Ag pastes with respective additions of 20 vol% PUF-C20 and Ag@mPUF-C20. By further analyzing the two rheological curves based on power law, the flow indices ( $n$ ) which indicates the degree of deviation from the well-dispersed Newtonian behavior ( $n = 1$ ) were 0.85 and 0.89 for the two Ag pastes with containing 20 vol% PUF-C20 and Ag@mPUF-C20, respectively. This result suggests that the agglomeration of PUF-C20 microcapsules is more severe than that of Ag@mPUF-C20 microcapsules in the Ag paste.
